# Supplementary material
Source: bioRxiv or medRxiv preprint supplement (https://medrxiv.org/highwire/filestream/81100/field_highwire_adjunct_files/0/2020.05.13.20101022-1.pdf)

## Appendix 1. Plots of reported nCFR(t) and closed case nCFR(t) for Australia, Austria, Iceland, Israel, New Zealand, and South Korea.

Shown below are plots of the reported closed case nCFR(t) curve and reported nCFR(t) curve for Austria, Australia, Iceland, Israel, New Zealand, and South Korea. The dashed gray line is the value which the closed case CFR(t) has converged to. As for Germany (Figure 4), it is seen that the reported closed case CFR(t) curve converges to a near constant value before the nCFR(t) curve. We found (Figure 5, Appendix 2), that for all countries we examined that the converged value of the closed case CFR was close to the optimum for predicting the nCFR(t) curve, consistent with it being a good approximation of the true corrected CFR for each country.

**Figure 1. Australia**

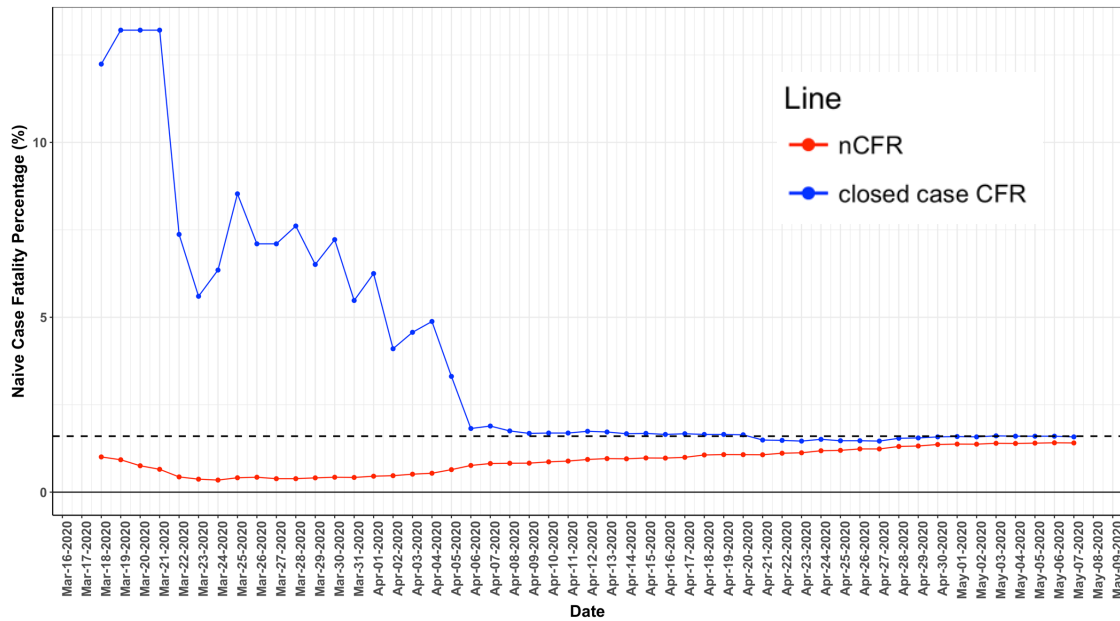

**Figure 2. Austria**

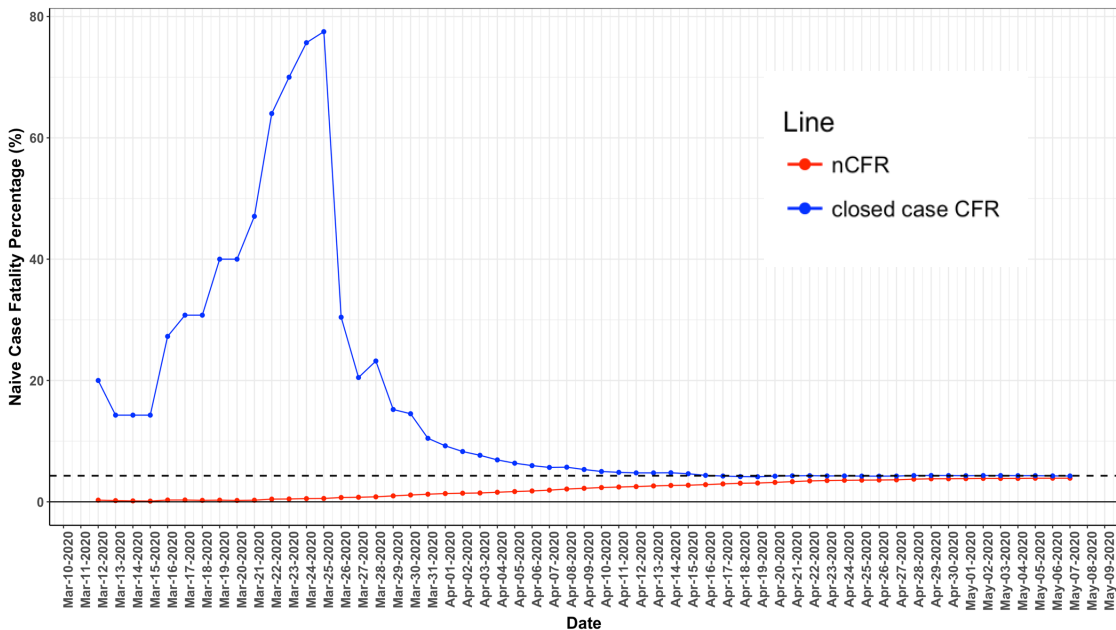

Figure 3. Iceland

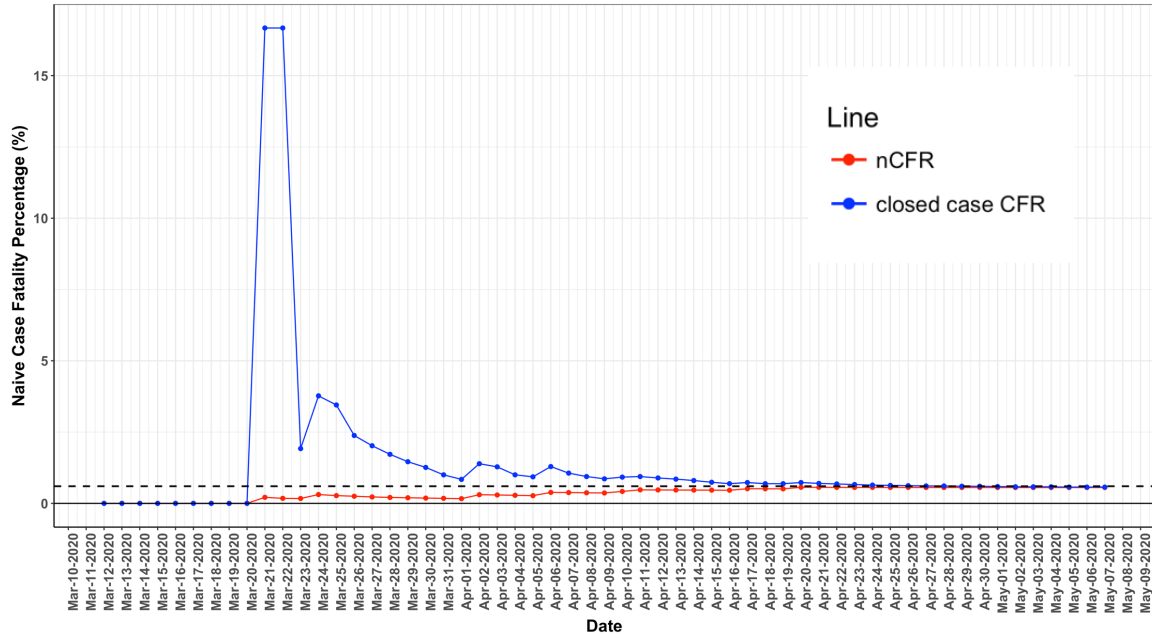

Figure 4. Israel

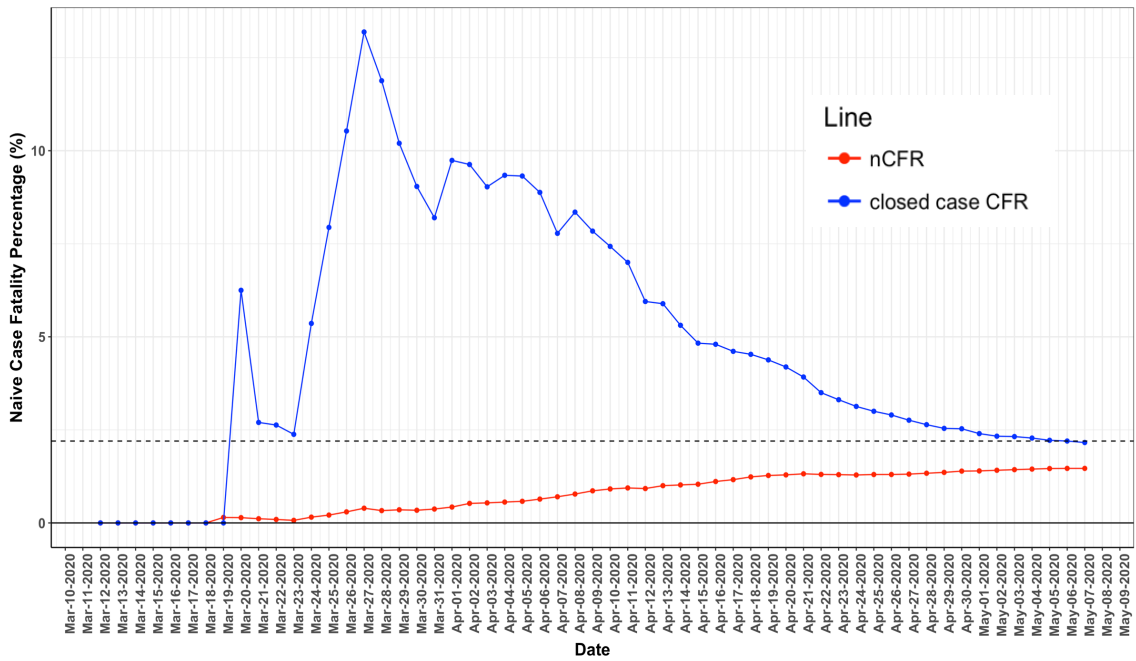

**Figure 5. New Zealand**

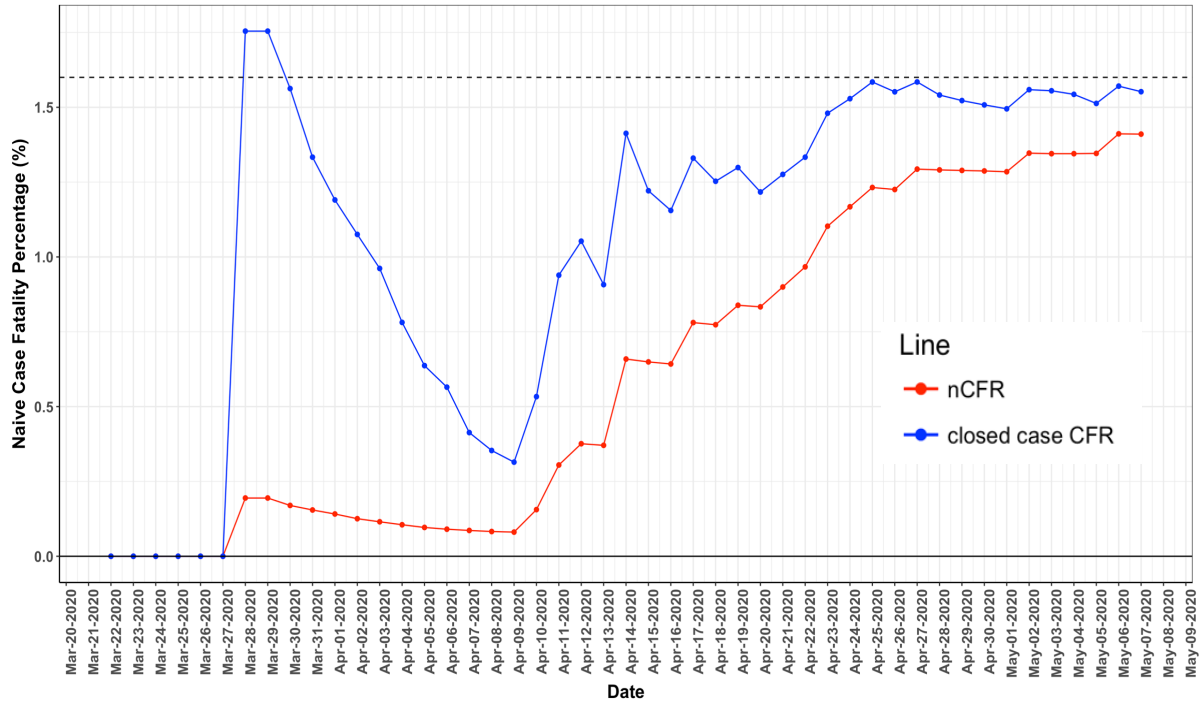

**Figure 6. South Korea**

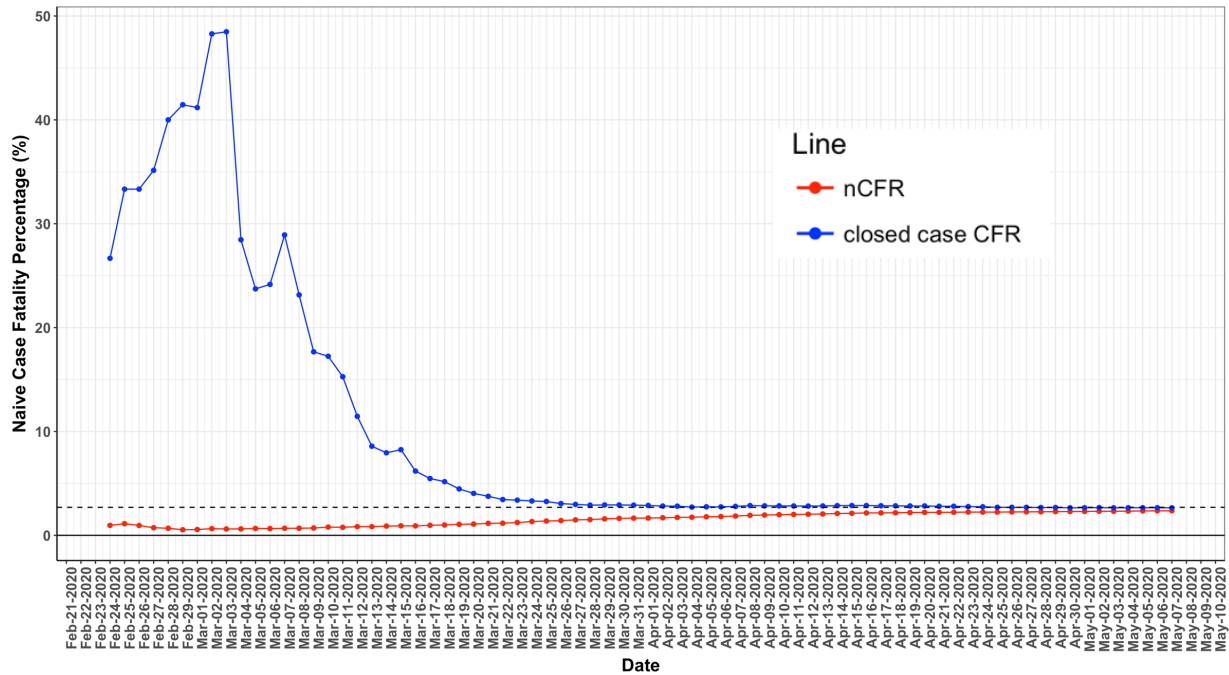

Supplement: Supplementary file [file 2020.05.13.20101022-1.pdf]
